# Supplementary material for: Pharmacokinetics of Ruxolitinib in Patients with Atopic Dermatitis Treated With Ruxolitinib Cream: Data from Phase II and III Studies
Source: PubMed Central journal article supplement — Am J Clin Dermatol. 2021 May 12;22(4):555–66. doi: 10.1007/s40257-021-00610-x (PMC8200345; doi:10.1007/s40257-021-00610-x), 2021-05-12

## Pharmacokinetics of Ruxolitinib in Patients With Atopic Dermatitis Treated With Ruxolitinib Cream

Xiaohua Gong, Xuejun Chen, Michael E. Kuligowski, Xing Liu, Xiang Liu, Evan Cimino, Ryan McGee, Swamy Yeleswaram\*

Incyte Corporation, Wilmington, DE, USA

\*Corresponding author: Swamy Yeleswaram; email: yeleswaram@incyte.com

**Online Resource 1.** Mean (95% CI) absolute neutrophil count over time after application of ruxolitinib cream in the phase 3 studies combined. *BQL* ruxolitinib cream treated but PK samples below the quantification limit,  $C_{ss}$  steady state concentration, *Q1 to Q4* 1<sup>st</sup> to 4<sup>th</sup> quartiles of ruxolitinib  $C_{ss}$  during VC period, *PK* pharmacokinetic, *VC* vehicle-controlled.

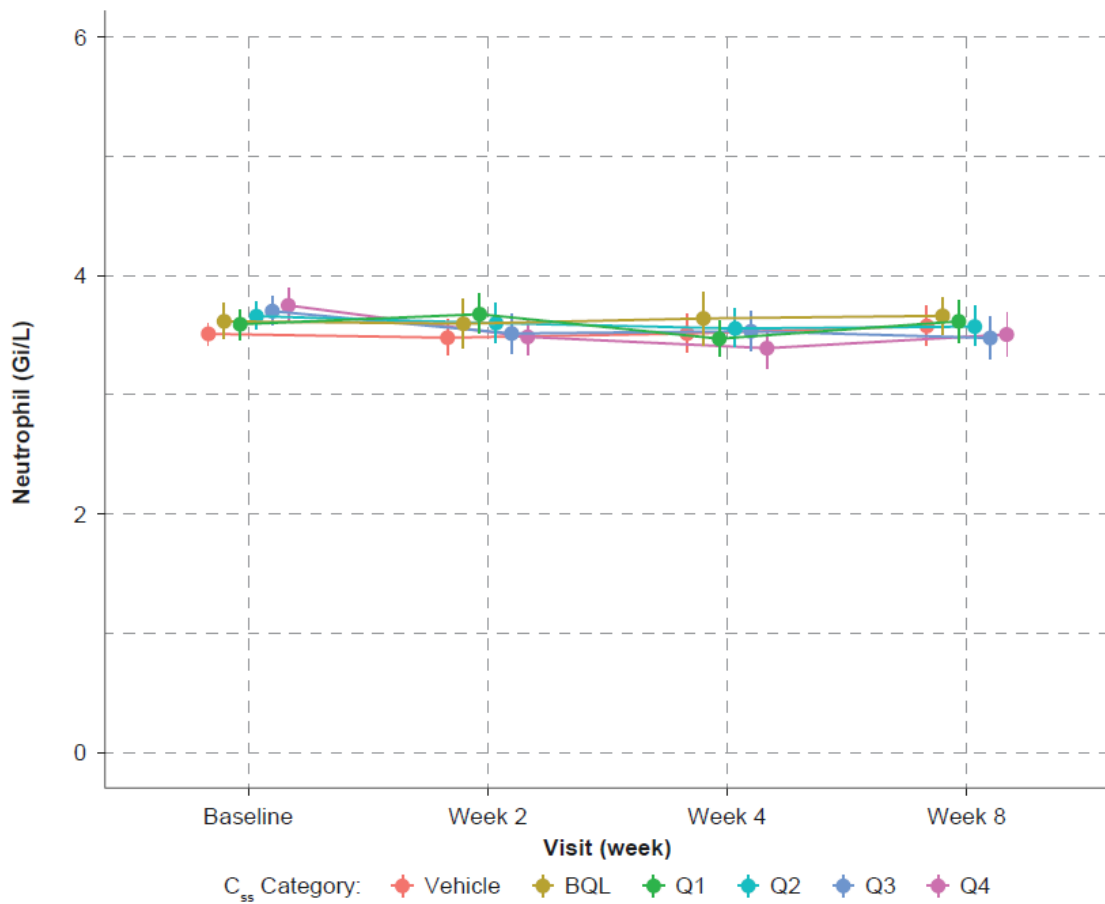

**Online Resource 2.** Mean (95% CI) hemoglobin levels over time after application of ruxolitinib cream in the phase 3 studies combined. *BQL* ruxolitinib cream treated but PK samples below the quantification limit,  $C_{ss}$  steady state concentration, *Q1* to *Q4* 1<sup>st</sup> to 4<sup>th</sup> quartiles of ruxolitinib  $C_{ss}$  during VC period, *PK* pharmacokinetic, *VC* vehicle-controlled.

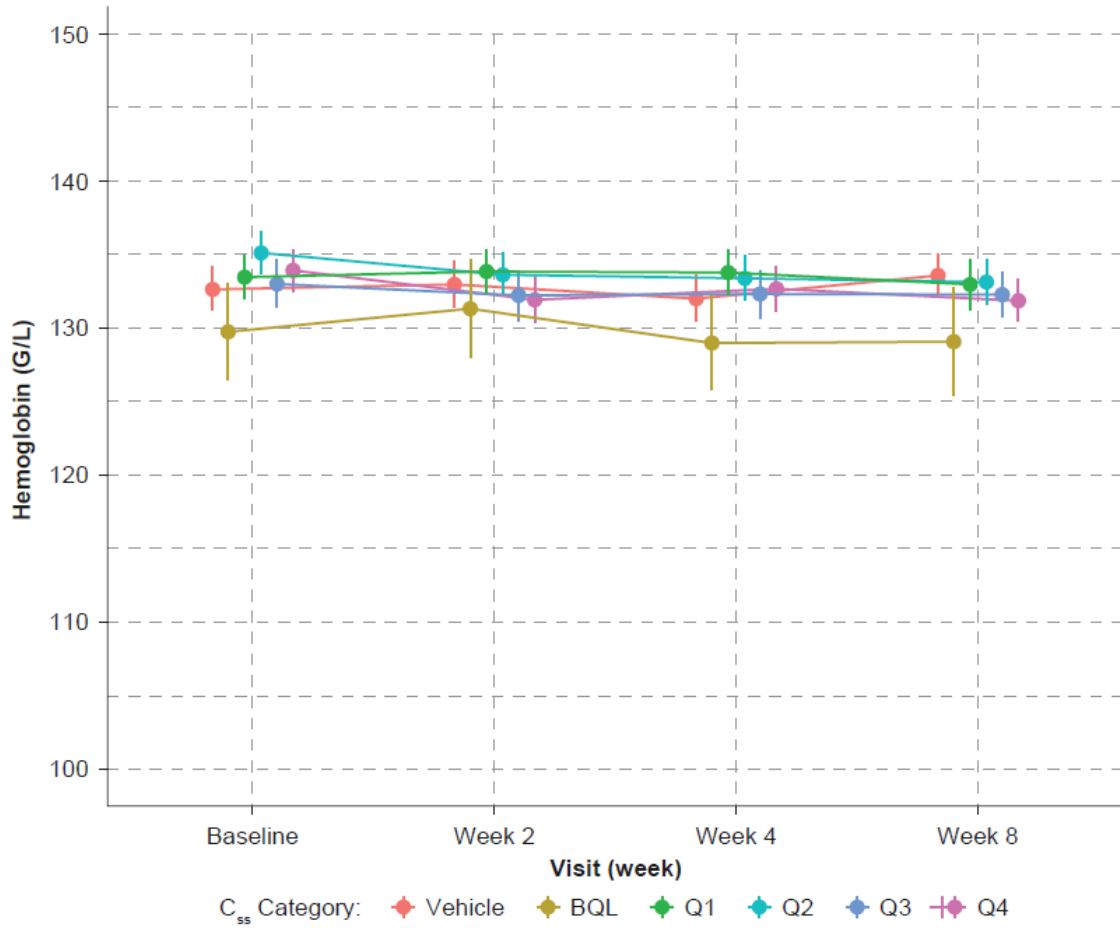

**Online Resource 3.** Mean (95% CI) of MPV over time after application of the ruxolitinib cream in the phase 3 studies combined. *BQL* ruxolitinib cream treated but PK samples below the quantification limit, *C<sub>ss</sub>* steady state concentration, *Q1* to *Q4* 1<sup>st</sup> to 4<sup>th</sup> quartiles of ruxolitinib *C<sub>ss</sub>* during VC period, *MPV* mean platelet volume, *PK* pharmacokinetic, *VC* vehicle-controlled.

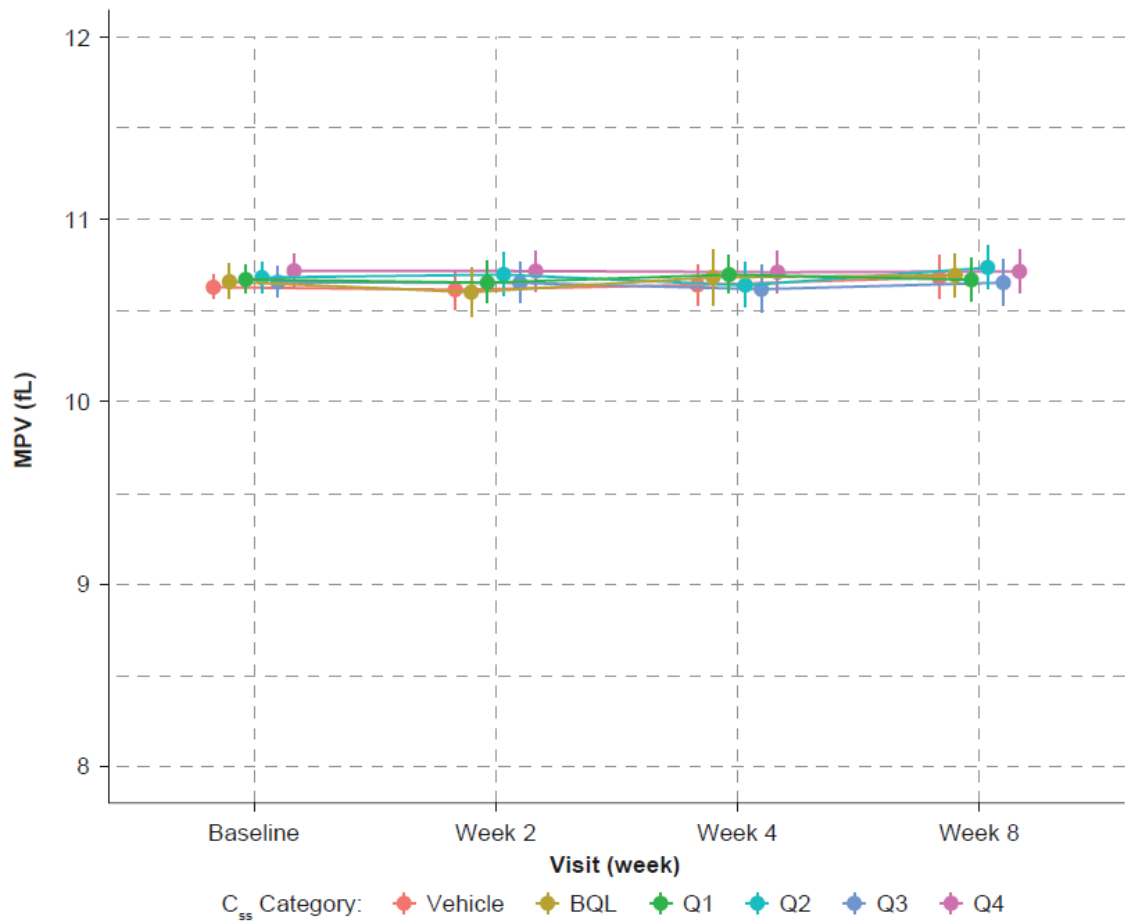

Supplement: 40257_2021_610_MOESM1_ESM.pdf [file 40257_2021_610_MOESM1_ESM.pdf]
